1 **BULLET POINTS**

- 2 1. Caffeine increases the extension time of the lumbar spine in the Biering-Sørensen test.
- 3 2. Caffeine decreases perceived exertion during the Biering-Sørensen test.
- 4 3. Caffeine increases muscle stimulation and recruitment of the *multifidus spinae* during
- 5 the Biering-Sørensen test.
- 6 4. Caffeine increases muscle stimulation of the *transversalis*/interne oblique muscles
- 7 during the Biering-Sørensen test.

8

1 **ABSTRACT**

2 **Background** Ergogenic evidence for caffeine is robust in sports and isolated limb tasks. Our  
3 objective was to evaluate a possible ergogenic effect on postural muscles, still unknown,  
4 through the Biering-Sørensen's lumbar extension test.

5 **Methods** A double-blind, controlled placebo, crossover study. Fifty-one healthy, physically  
6 inactive male subjects (18-25 years) with average body mass (BMI 18.5 – 24.9 kg/m<sup>2</sup>) were  
7 recruited. The subjects received oral caffeine (6 mg/kg) and saline (0.3%) in two cross-  
8 evaluations separated by one week. The primary outcome was the time in the Biering-  
9 Sørensen test after 1 hour of treatment. The secondary outcomes were peak lumbar extension  
10 force, rating of perceived exertion, EMG's median frequency and muscle recruitment of  
11 *multifidus spinae* and *transversalis/interne oblique* muscles, and cardiovascular variables  
12 (heart rate and blood pressure).

13 **Results** 27 subjects were blindly treated with caffeine and saline. Caffeine was ergogenic  
14 during the Biering-Sørensen test. It increased lumbar extension time ( $d=0.34$ ,  $P<0.05$ ), but not  
15 peak force. The perception of effort decreased with caffeine ( $d=0.37$ ,  $P<0.05$ ). Caffeine  
16 increased muscle stimulation frequency ( $P<0.05$ ) and recruitment ( $\eta^2=0.49$ ,  $P<0.05$ ) of  
17 *multifidus spinae*. In the *transversalis/interne oblique* muscles, caffeine increased the median  
18 frequency ( $\eta^2 = 0.13$ ,  $P<0.05$ ) and the distribution of higher frequencies ( $P<0.05$ ). Caffeine also  
19 increased muscle recruitment in the *transversalis/interne oblique* muscles ( $\eta^2=0.94$ ,  $P<0.05$ ).  
20 Tachycardia and increased blood pressure at the lumbar test were higher in the caffeine  
21 condition ( $P<0.05$ ).

22 **Conclusions** Our results show that caffeine is ergogenic for postural muscles. Decreased RPE  
23 and improved muscle activity suggest central mechanisms of caffeine.

24 **Trial registration** UTN U1111-1234-2079.



## 1 INTRODUCTION

2 Caffeine (1,3,7-trimethylxanthine) is one of the most used ergogenic substances by physical  
3 activity practitioners and athletes [1–10]. Caffeine is hydrophilic, fast absorbed, and  
4 distributed to all body tissues [11,12]. Caffeine, a non-selective competitive adenosine  
5 receptor antagonist ( $A_{1R}$  and  $A_{2AR}$  subtypes), increases endurance [1,8–10,13,14], intermittent  
6 [7,15,16] and resistance [4,17] exercise. The most used caffeine dose is 6 mg/kg, 1-hour before  
7 physical activity [1–10]. Ergogenic doses of caffeine have minor adverse effects, such as  
8 angiogenesis, insomnia, and gastrointestinal discomfort [18].

9       The main pharmacological effect is to counteract adenosine, an inhibitory modulator  
10 of the central nervous system (CNS) [11,12]. Evidence suggests that caffeine modifies  
11 neurological activity when ergogenic. Caffeine decreases rate of perceived exertion [4–6,9,19],  
12 pain [4,6,20–22], central and mental fatigue during exercise[23–26]. Studies are showing  
13 decreased exercise-induced saccade fatigue [23,24], increased brain motor area potentiation  
14 after transcranial magnetic stimulation [25], and modifies spinal excitability and cortical silence  
15 in fatigued muscles [27,28]. Caffeine also improves exercise performance expectations [26],  
16 cognitive and executive functions [19,29–31], and vigor [32] in exercising subjects. In animal  
17 studies, caffeine fails to be ergogenic in a mouse lacking neuronal  $A_{2AR}$  [33] and rats treated  
18 with 5'-N-ethylcarboxamidoadenosine (NECA), an adenosine analog [34,35].

19       We conducted this study to evaluate the effects of caffeine on endurance (Biering-  
20 Sørensen test) and electrical activity (electromyography – EMG) of core muscles, a well-  
21 controlled experiment in our laboratory [36]. There is ergogenic evidence for upper and lower  
22 limb muscles [37–40], but not for core muscles. Recently, these muscles are part of the sports  
23 training routine, as they are essential for performance enhancement [41,42] and injury  
24 prevention [43,44] in athletes. The possible ergogenic effects of caffeine on core muscles can

1 contribute to better periodization, as well as used in regeneration and treatment mesocycles,  
2 in addition to dedicated mesocycles for performance, tapering, and competitions.

3

#### 4 **METHODS**

##### 5 **Study design and subjects**

6 We conducted a randomized, double-blind, placebo-control, crossover study, where both  
7 examiner and subjects were unaware of ingested substances. Recruitment was carried out  
8 through social networks in the community within the micro-region of Araranguá (south  
9 latitude 28°56'05 "and west longitude 49°29'09"), southern Brazil. Subjects also collaborated  
10 in the recruitment of others, according to the public involvement statement. We called the  
11 volunteers for clarification on the study design, and the inclusion and exclusion criteria. The  
12 study followed the CONSolidated Standards of Reporting Trials (CONSORT).

13 We recruited healthy, physically inactive male subjects with average body mass (BMI  
14 18.5 – 24.9 kg/m<sup>2</sup>) aged 18-25 years. The screening included a semi-structured interview about  
15 medical regarding medical history, coffee consumption [45], and the International Physical  
16 Activity Questionnaire (IPAQ) – short form – Brazilian version [46–48]. Exclusion criteria:  
17 smokers; hypertension; diabetes; lumbar and orthopedic diseases; neurological, cardiac and  
18 gastric diseases; continued use of antidepressants and medications or supplements containing  
19 caffeine; and engaging physical activities more than two times/wk.

20 The study respected the declaration of Helsinki. Moreover, the Brazilian National  
21 Health Council also requires compliance with ethical principles of Resolution No. 466 of  
22 December 12, 2012. All subjects signed a consent form before inclusion in the study. The trial  
23 was approved by the Brazilian Ethics Committee (<http://plataformabrasil.saude.gov.br>) with  
24 file number CAEE 86400418.0.0000.0121 and was prospectively registered (trial RBR-39JNP4)

1 in the Brazilian Clinical Trials Register (<http://www.ensaiosclinicos.gov.br/>). The Universal Trial  
2 Number (UTN) is U1111-1234-2079.

3

#### 4 **Randomization and blinding**

5 All eligible subjects were evaluated when treated with vehicle or caffeine, blinded to the  
6 researchers through tubes reporting substance 1 or A, respectively. Subjects were randomized  
7 in a 1:1. One independent researcher (MCS) carried out simple randomization with a coin toss  
8 to start the test with a blinded substance. Other blinded research assistants (LC, TN, and MG)  
9 to treatment administered all outcome measures. The statistician was unaware of treatment  
10 allocation before completion of data collection and data cleaning.

11

#### 12 **Intervention**

13 Caffeine and sodium chloride (NaCl) with 98% purity was purchased from Sigma-Aldrich®  
14 (Brazil). The subjects' body mass was measured, a concentrated caffeine solution (3 mg/mL)  
15 was prepared freshly, and the individual volume adjusted by multiplying body mass by two.  
16 The vehicle was a 0.3% NaCl in tap water. Subjects drank identical volumes of caffeine (6  
17 mg/kg) or vehicle, 1-hour before the Biering-Sørensen test, the time necessary to reach plasma  
18 peaks. A researcher (LC) followed the subjects for 24 hours to monitor the development of  
19 adverse effects of caffeine or other symptoms.

20

#### 21 **Measurements**

22 The analyzes were performed in the Evaluation and Rehabilitation of the Locomotor System  
23 Lab (Laboratório de Avaliação e Reabilitação do Aparelho Locomotor – LARAL, UFSC,  
24 Araranguá-SC, Brazil). Participants were advised to continue habitual eating throughout the  
25 study. Physical activity, alcohol consumption, and caffeine (food and beverages) were avoided  
26 in the 48 hours before the tests. Each test was performed on two separate days, with 1-week

1 intervals, during the morning or afternoon, according to the subjects' agenda availability. The  
2 researchers sought all subjects for evaluations in the laboratory.

3 After 1 hour of oral treatment, the endurance of *multifidus spinae* was assessed by  
4 peak extensor force [36], and the Biering-Sørensen test [36]. At the same time,  
5 electromyography (EMG) assessed the median frequency and muscle recruitment (Root mean  
6 Square of EMG signal – RMS) of *multifidus spinae* and *transversalis*/interne oblique muscles  
7 [36], Borg Rating of Perceived Exertion – RPE – Brazilian version (30-s intervals) [49,50] were  
8 performed. Heart Rate (HR) was assessed during rest and at 15-s intervals during the test. At  
9 the end of the test, we evaluated lactate capillary blood (earlobe) levels [51,52] and collected  
10 antecubital venous blood samples for plasma separation and storage (-80°C). Plasma caffeine  
11 concentrations were assessed using High-Performance Liquid Chromatography – HPLC [53].

12

### 13 **Outcomes and sample size**

14 We designed this trial to detect changes in the Biering-Sørensen test time (primary outcome)  
15 and peak force (secondary outcome), RPE (secondary outcome), and EMG's median frequency  
16 and muscle recruitment (secondary outcome). The study was carried out with 27 subjects to  
17 have 85% power with alpha = 0.05.

18

### 19 **Statistics**

20 A blinded researcher (ASAJr) performed the statistical analysis according to an intention-to-  
21 treat principle. The results were described on mean  $\pm$  SD. We assessed the normal distribution  
22 of results before statistical comparisons. Paired Student's t-test analyzed Biering-Sørensen  
23 time and peak force, blood lactate levels, RPE and HR (area under the curve – AUC), and final  
24 10% of EMG median frequency. The final 10% of the RMS was assessed through Wilcoxon  
25 matched-pairs signed-rank test. This analysis was performed using GraphPad Prism (v. 5.0,



1 GraphPad Software). The STATISTICA (v. 8.0, StatSoft, Inc.) was used to compare ANOVA of  
2 EMG median frequency and RMS, chi-square test of EMG median frequencies, and Mann  
3 Whitney test of HR.  $P < 0.05$  was considered significant. Effect sizes (Cohen's  $d$ ) were calculated  
4 for between-group changes in mean differences for all outcome measures, where a Cohen's  
5  $d = 0.2$  represents a 'small' effect size, 0.5 represents a 'medium' effect size and 0.8 a 'large'  
6 effect size [54]. Cohen's  $\eta^2$  was used for repeated measurements, defined as 0.02 small, 0.13  
7 medium, and 0.26 large [54].

8

### 9 **Public Involvement statement**

10 There were no funds or time allocated for public involvement, so we were unable to involve  
11 subjects. We have invited subjects to help us develop our dissemination strategy.

12

## 13 **RESULTS**

### 14 **Subjects and plasma caffeine levels**

15 Fifty-one subjects were recruited between 7/15/2018 and 12/15/2018, interrupted on  
16 5/11/2018 when the sample size was completed. Fig.1 shows the participant flow. Figure 1  
17 shows the trial profile as per the Consolidated Standards of Reporting Trials [55]. There were  
18 27 undergraduate students, single, with ideal body mass index, irregularly active and light  
19 (25.9%), moderate (48.1%), and high (25.9%) coffee consumers. Table 1 shows the subjects'  
20 demographic and baseline data.

21 Subjects consumed  $404.9 \pm 55.3$  mg of caffeine (CI 95% 382 – 427.7) before the test, rising to  
22 plasma  $0.086 \pm 0.04$  nmol/L (CI 95% 0.06 – 0.11) after 1 hour. Even after 48 h of withdrawal of  
23 caffeinated foods and drinks, plasma levels were  $0.011 \pm 0.03$  nmol/L (CI 95% 0 – 0.04) when

1 treated with a vehicle. We followed the subjects for 24-hours and reported no adverse effects  
2 such as tachycardia, angiogenesis, insomnia, gastrointestinal discomfort, or other symptoms.

3

#### 4 **Caffeine increases fatigue resistance of spinal muscles**

5 *Primary outcome.* Caffeine had a small effect size on increasing  $13.8 \pm 6.3$  % Biering-Sørensen  
6 endurance, but not peak force (Table 2).

7 *Secondary outcomes.* Caffeine induced a moderate effect size on increased blood lactate  
8 production (Table 2), a biomarker of exercise intensity. Biering-Sørensen test reached RPE  
9 intensities classified as moderate to intense ( $F_{6,258}=64$ ,  $\eta^2=0.6$ ,  $\beta=1.0$ ,  $P<0.05$ , Fig.2A).  
10 Moreover, caffeine had a moderate effect on decreased RPE (Table 2). HR increased during the  
11 test ( $F_{13,637}=6$ ,  $\eta^2=0.11$ ,  $\beta=1.0$ ,  $P<0.05$ , Fig.2B), and caffeine demonstrated a great positive  
12 chronotropic effect during the physical test ( $P<0.05$ , Fig.2C, Table 2).

13

#### 14 **Caffeine stimulates spinal muscles activity**

15 *Secondary outcomes.* The EMG-force ratio determines the neuromuscular status of muscle.  
16 The EMG-force ratio shows that caffeine decreases fatigue (right shift) in the *multifidus spinae*  
17 and *transversalis/interne oblique* muscles (Fig.2D).

18 EMG revealed that caffeine increased muscle recruitment and frequency of stimulation  
19 of *multifidus spinae* and abdominal, suggesting attenuation of muscle fatigue. The median  
20 frequency of *multifidus spinae* decreased over Biering-Sørensen test ( $F_{29,1131}=127$ ,  $\eta^2=0.76$ ,  
21  $P<0.05$ , Fig.3A), an EMG marker of muscle fatigue, without differences in treatment ( $F_{1,39}=0.2$ ,  
22  $\eta^2=0.005$ ,  $P<0.05$ , Fig.3A). However, the distribution of median frequencies revealed higher  
23 frequencies on caffeine-treated subjects ( $\chi^2_1=144$ ,  $P<0.05$ , Fig.3B). Caffeine still had a large  
24 effect size ( $\eta^2=0.49$ ) on increasing *multifidus spinae* RMS values (recruitment of new muscle

1 fibers) throughout the Biering-Sørensen test, from the beginning ( $F_{1,540} = 53$ ,  $P < 0.05$ , Fig.3D) to  
2 the end of the test ( $P < 0.05$ , Fig.3E).

3 Caffeine ergogenic effect size was medium ( $\eta^2 = 0.13$ ) on increased median frequency  
4 ( $F_{29,1073} = 9.7$ ,  $P < 0.05$ , Fig.4A) of *transversalis/interne oblique*. The distribution of median  
5 frequencies shifted to the right, for higher frequencies ( $\chi^2_1 = 2900$ ,  $P < 0.05$ , Fig.4B) as in the  
6 *multifidus spinae*. The effect size of caffeine-increased muscle recruitment was also large  
7 ( $\eta^2 = 0.94$ ,  $F_{1,540} = 87$ ,  $P < 0.05$ , Fig.4D). These ergogenic effects disappeared in the final 10% of the  
8 Biering-Sørensen test (Fig.4C, and E).

9

## 10 DISCUSSION

### 11 New ergogenic effects of caffeine on postural muscles

12 We first demonstrated the ergogenic effects of caffeine on postural muscles - *multifidus spinae*  
13 and *transversalis/interne oblique*, components of core muscles. Core muscles are essential for  
14 physical performance and injury prevention, goals of sports medicine. The increase Biering-  
15 Sørensen endurance (or resistance to fatigue) had small effect size, as well established for  
16 other muscle groups and activities [4–6,9]. The Biering-Sørensen test is the most robust  
17 predictor for low back pain and trunk stability [43], with implications from health to elite sport.  
18 Strengthening core muscles increases Biering-Sørensen test performance and decreases low  
19 back pain [43,44]. There is not much evidence in the sports sciences. Water polo, soccer, and  
20 rowing athletes performed well in the Biering-Sørensen test ( $163.6 \pm 50.7$  sec) [41,42]. Muscle  
21 activity of abdominal and spine extensors of long-distance runners and triathletes were higher  
22 in the Biering-Sørensen test, which contributes to running performance, such as more  
23 excellent absorption by the trunk muscles of disrupting torques generated by the lower limbs  
24 [41,42].

1       The Biering-Sørensen test performance also directly influences athletes' motivation and  
2 self-efficacy [56]. Athletes are more resistant to high blood lactate concentrations, pain, and  
3 fatigue [2,7]. Psychological factors are associated with this performance, such as improved  
4 motivation and experience [4–6,9,57]. Moderate doses of caffeine (3-6 mg/kg) decrease RPE in  
5 athletes [4–6,9]. We observed this same effect of caffeine (6 mg/kg) in this spine muscle stress  
6 test. Effort perception is a brain function; neurophysiology involves central fatigue and  
7 diminished cortical arousal [58], increased cortical activity during movement in the primary  
8 motor and supplementary movement areas [59], and increased activation of the temporal and  
9 insular cortex [60]. This evidence retrieves the CNS's role in the development of central fatigue  
10 [24,27,28,33–35,57,61–64]. Here, the effect of caffeine on RPE and EMG reinforces this idea.

11

## 12 **Caffeine decreases central fatigue**

13 Caffeine modified the EMG response in the Biering-Sørensen test. EMG activation is the  
14 preliminary condition for any force development. Here, caffeine-induced a substantial increase  
15 in muscle recruitment, a moderate increase in the high frequency of stimulation, and  
16 decreased fatigue (EMG/force ratio) of *multifidus spinae* and *transversalis/interne oblique*  
17 muscles. There is no evidence about the effects of caffeine on these muscles, but other muscle  
18 groups have a similar EMG response to caffeine. Caffeine (5 mg/kg) improved performance in  
19 the cycling time trial and increased Maximal voluntary strength (MVC), power output, and  
20 muscle recruitment of *vastus lateralis and medialis* [38,40]. Caffeine (6 mg/kg) increased the  
21 elbow's maximum flexor torque, muscle recruitment, and fiber conduction velocity [40].  
22 Muscle strength was higher in electrically stimulated *adductor pollicis* and ankle dorsiflexors  
23 muscles of caffeine-supplemented subjects (500 mg and 6 mg/kg) [37,39]. Caffeine decreased  
24 low-frequency fatigue (20, 30, and 40 Hz stimulation) in these muscles, which is a reduction in  
25 expected muscle force (fatigue) due to an impairment of excitation-contraction coupling.

1 Caffeine did not modify muscle strength at higher stimulation frequencies (> 40 Hz) [37,39],  
2 such as those achieved voluntarily in this study.

3 This evidence reinforces the role of caffeine in central fatigue, which also modifies cortical  
4 silent period (CSP) and spinal excitability [27,28]. A transcranial magnetic stimulation (TMS)  
5 fatigued *abductor digiti minimi* muscle and caffeine reduced CSP [27]. CSP refers to an  
6 interruption of voluntary contraction by electrical or magnetic stimulation of the motor cortex.  
7 Caffeine also increased spinal excitability by increasing the slope of the H-reflex recruitment  
8 curve normalized to M wave ( $H_{s,lp}/M_{s,lp}$ ), which provides an alternative measure of  
9 monosynaptic reflex gain [28]. These are evidence of the neurophysiological components of  
10 the ergogenic effects of caffeine. Moreover, our experimental design removed caffeine for 48  
11 hours from subjects, moderate coffee consumers, which may have enhanced our ergogenic  
12 results [65].

13

#### 14 **Advancing caffeine's mechanisms of action: negative allosteric neuromodulation of** 15 **adenosinergic receptors**

16 However, the mechanisms of action of caffeine's ergogenic effects are intriguing. For a long  
17 time, literature insisted on the mobilization of intracellular  $Ca^{+2}$  and inhibition of  
18 phosphodiesterase [1,2,7,66]. These biological effects are achieved *in vitro* (in millimolar  
19 concentrations,  $10^{-3}$ ), but toxic and lethal *in vivo* [12,67]. Recent studies discuss CNS's  
20 antagonism of the adenosinergic system as a possible candidate mechanism of caffeine  
21 [27,28,33,34]. Electrophysiological studies support the positive effect of caffeine on vigilance,  
22 attention, speed of reaction, information processing, and arousal [27]. Caffeine acts on the  
23 CNS decrease the perception of effort and modifies the motor drive. A1 receptor ( $A_1R$ ) and  
24  $A_{2A}R$  are primarily responsible for the central effects of adenosine [68], also the main target of  
25 nontoxic psychostimulant doses of caffeine in micromolar levels ( $10^{-6}$ ) [67,69]. Generally,

1 blocking presynaptic A<sub>1</sub>R increases the probability of neurotransmitter release, including  
2 dopamine and serotonin, whereas blocking presynaptic A<sub>2A</sub>R decreases neurotransmitter  
3 release [17,68,70]. A<sub>1</sub> blockade could reinforce Meeusen's untested hypothesis about central  
4 fatigue [62], an exercise-induced increase in extracellular serotonin stimulating sleep, lethargy,  
5 and drowsiness, and loss of motivation. Adenosine is a neuromodulator responsible for these  
6 latter effects [71,72]. Caffeine decreases CSP in fatigued muscles [27]. Experimental  
7 manipulation of GABA<sub>B</sub> inhibitory presynaptic receptors modulate CSP [73,74]. In this context,  
8 caffeine might interfere with GABAergic neurotransmission in different ways [75]. Moreover,  
9 basal forebrain cholinergic neurons are under tonic inhibitory control of endogenous  
10 adenosine [71]. A<sub>2A</sub>R is highly expressed in the basal ganglia, with emphasis on the ventral  
11 striatopallidal GABA pathway, where they form functional heteromeric receptor complexes  
12 (A<sub>2A</sub>R-D<sub>2</sub>) with inhibitory presynaptic dopaminergic D<sub>2</sub>-like receptors. D<sub>2</sub>-like receptors  
13 decrease adenylyl cyclase activity through G<sub>i/o</sub> proteins [76]. Caffeine and selective A<sub>2A</sub>R  
14 antagonists produce psychostimulant effects, not just by competing with adenosine for its  
15 binding to the A<sub>2A</sub>R, but also by exerting a negative allosteric modulation within the A<sub>2A</sub>R of  
16 A<sub>2A</sub>R-D<sub>2</sub> heterotetramer [76]. Under normal conditions, employing the negative heteromeric  
17 allosteric modulation, endogenous adenosine tonically inhibits psychomotor activation  
18 mediated by tonic activation of D<sub>2</sub>R by endogenous dopamine. Caffeine, through negative  
19 allosteric modulation, counteracts the effect of adenosine and produces psychomotor  
20 activation [76]. Caffeine (a non-selective A<sub>1</sub> and A<sub>2A</sub>R antagonist) and SCH 58261 (potent and  
21 selective A<sub>2A</sub>R antagonist) are psychostimulants [33,77,78]. Davis [34] demonstrated that NECA  
22 (A<sub>1</sub>R and A<sub>2A</sub>R agonist) inhibits the ergogenic effects of caffeine in rats. We demonstrated that  
23 SCH 58261 is ergogenic in mice and that the ergogenic effect of caffeine disappears in mice  
24 knocked out to neuronal A<sub>2A</sub>R in the CNS [33]. In the present study, we demonstrated that  
25 caffeine decreases the perception of effort and increases muscle excitation in humans,

1 increasing the excitation-contraction efficiency of spine muscles. This evidence jointly  
2 reinforces the role of caffeine in mitigating central fatigue during exercise.

3

#### 4 **Health impacts**

5 Caffeine supplementation did not impact the subjects' general health. Monitoring the subjects  
6 for 24 hours did not reveal any known adverse effects of caffeine, such as tachycardia,  
7 angiogenesis, insomnia, gastrointestinal discomfort, or other symptoms. Dietary consumption  
8 and experimental treatment offered approximately 400 mg of caffeine daily to the subjects, a  
9 dose considered safe and free of adverse effects in moderate consumers [18].

10

#### 11 **Limitations**

12 We have identified two limitations of this study. We did not perform a blinding assessment  
13 and identified residual caffeine in the plasma of some subjects. This last point shows flaws in  
14 the withdrawal protocol. However, blood caffeine concentrations are not a standard measure  
15 in most studies focusing on ergogenicity. At the same time, blood caffeine is a strong point of  
16 the study. This study is a simple and reproducible experimental design. Increasing the sample  
17 size to include patients and athletes of different sexes and ages is necessary for generalization  
18 and applicability of these results.

19

#### 20 **CONCLUSION**

21 In summary, our results show that caffeine is ergogenic for postural muscles. As an ergogenic  
22 resource, caffeine may benefit patients with back pain. The results also reinforce the ergogenic  
23 role in sport. Decreased RPE and improved muscle activity suggest central mechanisms of  
24 caffeine. That is, caffeine attenuates central fatigue during acute exercise.

1

2 **Acknowledgements** We thank Dr. Fernando Diefenthaler (Biomechanics  
3 Laboratory/CDS/UFSC) for his assistance with EMG routines and Dr. Alexandra Latini  
4 (LABOX/CCB/UFSC) for using HPLC.

5 **Contributors** LC, IJCS, HK, and ASAJr conceived the study and designed the study in  
6 collaboration. LC, TN, MG, MCS, and VB carry out recruitment, blinding, experiments, and data  
7 collection. ACBA and DLS performed the HPLC. LC and ASAJr analyzed the data. ASAJr did the  
8 statistical analysis. LC, TR, and ASAJr wrote the manuscript. All authors interpreted the data  
9 and contributed to subsequent drafts of the manuscript, and all authors have seen and  
10 approved the final version.

11 **Funding** This study was financed by the Coordenação de Aperfeiçoamento de Pessoal de Nível  
12 Superior–Brasil (CAPES)–Finance Code 1, Conselho Nacional de Desenvolvimento Científico e  
13 Tecnológico (CNPq) and Fundação de Amparo à Pesquisa e Inovação do Estado de Santa  
14 Catarina (FAPESC). A.S.A. Jr. is a CNPq fellow.

15 **Competing interests** None declared.

16 **Ethics approval** was obtained (CAAE 86400418.0.0000.0121) from the Brazilian human ethics  
17 committee (<http://plataformabrasil.saude.gov.br>).

18 **Trial** The Universal Trial Number (UTN) is U1111-1234-2079. The protocol consultation is  
19 available in the Brazilian Registry of Clinical Trials (<http://www.ensaiosclinicos.gov.br/>) under  
20 number “RBR-39JNP4” and title “The biology of the ergogenic effects of caffeine.”

21 **Data sharing statement** Anonymous data will be available beginning three months and ending  
22 five years following article publication for researchers who provide a methodologically sound  
23 proposal.

24 **Provenance and peer review** Not commissioned; externally peer-reviewed.



1

2 **REFERENCES**

- 3 1 Graham TE, Spriet LL. Metabolic, catecholamine, and exercise performance responses  
4 to various doses of caffeine. *J Appl Physiol* Published Online First: 1995.  
5 doi:10.1152/jappl.1995.78.3.867
- 6 2 Tarnopolsky MA. Effect of caffeine on the neuromuscular system - Potential as an  
7 ergogenic aid. In: *Applied Physiology, Nutrition and Metabolism*. 2008.  
8 doi:10.1139/H08-121
- 9 3 McNaughton LARS. Two levels of caffeine ingestion on blood lactate and free fatty acid  
10 responses during incremental exercise. *Res Q Exerc Sport* Published Online First: 1987.  
11 doi:10.1080/02701367.1987.10605458
- 12 4 Grgic J, Mikulic P. Caffeine ingestion acutely enhances muscular strength and power but  
13 not muscular endurance in resistance-trained men. *Eur J Sport Sci* Published Online  
14 First: 2017. doi:10.1080/17461391.2017.1330362
- 15 5 Doherty M, Smith PM, Hughes MG, *et al.* caffeine lowers perceptual response and  
16 increases power output during high-intensity cycling. *J Sports Sci* Published Online First:  
17 2004. doi:10.1080/02640410310001655741
- 18 6 Duncan MJ, Stanley M, Parkhouse N, *et al.* Acute caffeine ingestion enhances strength  
19 performance and reduces perceived exertion and muscle pain perception during  
20 resistance exercise. *Eur J Sport Sci* Published Online First: 2013.  
21 doi:10.1080/17461391.2011.635811
- 22 7 Davis JK, Green JM. Caffeine and anaerobic performance: Ergogenic value and  
23 mechanisms of action. *Sport. Med.* 2009;**39**:813–32. doi:10.2165/11317770-  
24 000000000-00000

- 1 8 Graham TE, Rush JWE, van Soeren MH. Caffeine and exercise: Metabolism and  
2 performance. *CAN.J.APPL.PHYSIOL*. 1994. doi:10.1139/h94-010
- 3 9 Stadheim HK, Spencer M, Olsen R, *et al.* caffeine and performance over consecutive  
4 days of simulated competition. *Med Sci Sports Exerc* Published Online First: 2014.  
5 doi:10.1249/MSS.0000000000000288
- 6 10 Jackman M, Wendling P, Friars D, *et al.* Metabolic, catecholamine, and endurance  
7 responses to caffeine during intense exercise. *J Appl Physiol* Published Online First:  
8 1996. doi:10.1152/jappl.1996.81.4.1658
- 9 11 Fredholm BB. Adenosine, Adenosine Receptors and the Actions of Caffeine. *Pharmacol*  
10 *Toxicol* Published Online First: 1995. doi:10.1111/j.1600-0773.1995.tb00111.x
- 11 12 FREDHOLM BB. On the Mechanism of Action of Theophylline and Caffeine. *Acta Med.*  
12 *Scand.* 1985. doi:10.1111/j.0954-6820.1985.tb01650.x
- 13 13 Flinn S, Gregory J, McNaughton LR, *et al.* Caffeine ingestion prior to incremental cycling  
14 to exhaustion in recreational cyclists. *Int J Sports Med* Published Online First: 1990.  
15 doi:10.1055/s-2007-1024789
- 16 14 Spriet LL, MacLean DA, Dyck DJ, *et al.* Caffeine ingestion and muscle metabolism during  
17 prolonged exercise in humans. *Am J Physiol - Endocrinol Metab* Published Online First:  
18 1992. doi:10.1152/ajpendo.1992.262.6.e891
- 19 15 Mohr M, Nielsen JJ, Bangsbo J. Caffeine intake improves intense intermittent exercise  
20 performance and reduces muscle interstitial potassium accumulation. *J Appl Physiol*  
21 Published Online First: 2011. doi:10.1152/japplphysiol.01028.2010
- 22 16 Trice I, Haymes EM. Effects of caffeine ingestion on exercise-induced changes during  
23 high-intensity, intermittent exercise. *Int J Sport Nutr* Published Online First: 1995.  
24 doi:10.1123/ijsn.5.1.37

- 1 17 Van Soeren MH, Sathasivam P, Spriet LL, *et al.* Caffeine metabolism and epinephrine  
2 responses during exercise in users and nonusers. *J Appl Physiol* Published Online First:  
3 1993. doi:10.1152/jappl.1993.75.2.805
- 4 18 Wikoff D, Welsh BT, Henderson R, *et al.* Systematic review of the potential adverse  
5 effects of caffeine consumption in healthy adults, pregnant women, adolescents, and  
6 children. *Food Chem Toxicol* Published Online First: 2017. doi:10.1016/j.fct.2017.04.002
- 7 19 Duncan MJ, Dobell AP, Caygill CL, *et al.* The effect of acute caffeine ingestion on upper  
8 body anaerobic exercise and cognitive performance. *Eur J Sport Sci* Published Online  
9 First: 2019. doi:10.1080/17461391.2018.1508505
- 10 20 Motl RW, O'Connor PJ, Dishman RK. Effect of caffeine on perceptions of leg muscle pain  
11 during moderate intensity cycling exercise. *J Pain* Published Online First: 2003.  
12 doi:10.1016/S1526-5900(03)00635-7
- 13 21 Maridakis V, O'Connor PJ, Dudley GA, *et al.* Caffeine Attenuates Delayed-Onset Muscle  
14 Pain and Force Loss Following Eccentric Exercise. *J Pain* Published Online First: 2007.  
15 doi:10.1016/j.jpain.2006.08.006
- 16 22 O'Connor PJ, Motl RW, Broglio SP, *et al.* Dose-dependent effect of caffeine on reducing  
17 leg muscle pain during cycling exercise is unrelated to systolic blood pressure. *Pain*  
18 Published Online First: 2004. doi:10.1016/j.pain.2004.01.017
- 19 23 Connell CJW, Thompson B, Kuhn G, *et al.* fatigue related impairments in oculomotor  
20 control are prevented by caffeine. *Sci Rep* Published Online First: 2016.  
21 doi:10.1038/srep26614
- 22 24 Connell CJW, Thompson B, Turuwhenua J, *et al.* Fatigue-related impairments in  
23 oculomotor control are prevented by norepinephrine-dopamine reuptake inhibition. *Sci*  
24 *Rep* Published Online First: 2017. doi:10.1038/srep42726

- 1 25 Kalmar JM, Cafarelli E. Central fatigue and transcranial magnetic stimulation: Effect of  
2 caffeine and the confound of peripheral transmission failure. *J Neurosci Methods*  
3 Published Online First: 2004. doi:10.1016/j.jneumeth.2004.03.006
- 4 26 Shabir A, Hooton A, Tallis J, *et al.* The influence of caffeine expectancies on sport,  
5 exercise, and cognitive performance. *Nutrients*. 2018. doi:10.3390/nu10101528
- 6 27 De Carvalho M, Marcelino E, De Mendonça A. Electrophysiological studies in healthy  
7 subjects involving caffeine. In: *Journal of Alzheimer's Disease*. 2010. doi:10.3233/JAD-  
8 2010-1377
- 9 28 Walton C, Kalmar J, Cafarelli E. Caffeine increases spinal excitability in humans. *Muscle*  
10 *and Nerve* Published Online First: 2003. doi:10.1002/mus.10457
- 11 29 Kumar N, Wheaton LA, Snow TK, *et al.* Exercise and caffeine improve sustained  
12 attention following fatigue independent of fitness status. *Fatigue Biomed Heal Behav*  
13 Published Online First: 2015. doi:10.1080/21641846.2015.1027553
- 14 30 Hogervorst E, Bandelow S, Schmitt J, *et al.* caffeine improves physical and cognitive  
15 performance during exhaustive exercise. *Med Sci Sports Exerc* Published Online First:  
16 2008. doi:10.1249/MSS.0b013e31817bb8b7
- 17 31 Hogervorst E, Riedel WJ, Kovacs E, *et al.* caffeine improves cognitive performance after  
18 strenuous physical exercise. *Int J Sports Med* Published Online First: 1999.  
19 doi:10.1055/s-2007-971144
- 20 32 Azevedo R, Silva-Cavalcante MD, Gualano B, *et al.* Effects of caffeine ingestion on  
21 endurance performance in mentally fatigued individuals. *Eur J Appl Physiol* Published  
22 Online First: 2016. doi:10.1007/s00421-016-3483-y
- 23 33 Aguiar AS, Speck AE, Canas PM, *et al.* Neuronal adenosine A2A receptors signal  
24 ergogenic effects of caffeine. *bioRxiv* Published Online First: 2020.

- 1           doi:10.1101/2020.04.02.021923
- 2    34    Davis JM, Zhao Z, Stock HS, *et al.* Central nervous system effects of caffeine and  
3           adenosine on fatigue. *Am J Physiol - Regul Integr Comp Physiol* Published Online First:  
4           2003. doi:10.1152/ajpregu.00386.2002
- 5    35    Zheng X, Hasegawa H. Administration of caffeine inhibited adenosine receptor agonist-  
6           induced decreases in motor performance, thermoregulation, and brain  
7           neurotransmitter release in exercising rats. *Pharmacol Biochem Behav* Published Online  
8           First: 2016. doi:10.1016/j.pbb.2015.10.019
- 9    36    Alves MC, de Souza Neto RJ, Barbosa RI, *et al.* Effects of a Pilates protocol in individuals  
10           with non-specific low back pain compared with healthy individuals: Clinical and  
11           electromyographic analysis. *Clin Biomech* Published Online First: 2020.  
12           doi:10.1016/j.clinbiomech.2019.12.009
- 13   37    Tarnopolsky M, Cupido C. Caffeine potentiates low frequency skeletal muscle force in  
14           habitual and nonhabitual caffeine consumers. *J Appl Physiol* Published Online First:  
15           2000. doi:10.1152/jappl.2000.89.5.1719
- 16   38    Felippe LC, Ferreira GA, Learsi SK, *et al.* caffeine increases both total work performed  
17           above critical power and peripheral fatigue during a 4-km cycling time trial. *J Appl*  
18           *Physiol* Published Online First: 2018. doi:10.1152/jappphysiol.00930.2017
- 19   39    Lopes JM, Aubier M, Jardim J, *et al.* Effect of caffeine on skeletal muscle function before  
20           and after fatigue. *J Appl Physiol Respir Environ Exerc Physiol* Published Online First:  
21           1983. doi:10.1152/jappl.1983.54.5.1303
- 22   40    Black CD, Waddell DE, Gonglach AR. Caffeine's ergogenic effects on cycling:  
23           Neuromuscular and perceptual factors. *Med Sci Sports Exerc* Published Online First:  
24           2015. doi:10.1249/MSS.0000000000000513

- 1 41 Behm DG, Cappa D, Power GA. Trunk muscle activation during moderate and high-  
2 intensity running. *Appl Physiol Nutr Metab* Published Online First: 2009.  
3 doi:10.1139/H09-102
- 4 42 Evans K, Refshauge KM, Adams R. Trunk muscle endurance tests: Reliability, and gender  
5 differences in athletes. *J Sci Med Sport* Published Online First: 2007.  
6 doi:10.1016/j.jsams.2006.09.003
- 7 43 Berglund L, Aasa B, Hellqvist J, *et al.* Which Patients with Low Back Pain Benefit from  
8 Deadlift Training? *J Strength Cond Res* Published Online First: 2015.  
9 doi:10.1519/JSC.0000000000000837
- 10 44 Kumar T, Kumar S, Nezamuddin M, *et al.* Efficacy of core muscle strengthening exercise  
11 in chronic low back pain patients. *J Back Musculoskelet Rehabil* Published Online First:  
12 2015. doi:10.3233/BMR-140572
- 13 45 Mitchell DC, Knight CA, Hockenberry J, *et al.* Beverage caffeine intakes in the U.S. *Food*  
14 *Chem Toxicol* Published Online First: 2014. doi:10.1016/j.fct.2013.10.042
- 15 46 Ipaq. Guidelines for Data Processing and Analysis of the International Physical Activity  
16 Questionnaire ( IPAQ ) – Short and Long Forms. *Ipaq* 2005.
- 17 47 S. Matsudo, T.Araújo, V. Matsudo, D. Andrade, E. Andrade, L.C. Oliveira GB.  
18 Questionário Internacional De Atividade Física (Ipaq): Estupo De Validade E  
19 Reprodutibilidade No Brasil. *Quest Int Atividade Física Estupo Validade E*  
20 *Reprodutibilidade No Bras* 2012;6:5–18. doi:10.12820/rbafs.v.6n2p5-18
- 21 48 Craig CL, Marshall AL, Sjöström M, *et al.* International physical activity questionnaire:  
22 12-Country reliability and validity. *Med Sci Sports Exerc* Published Online First: 2003.  
23 doi:10.1249/01.MSS.0000078924.61453.FB
- 24 49 Borg GAV. Psychophysical bases of perceived exertion. *Med Sci Sports Exerc* 1982.

- 1 50 Chen MJ, Fan X, Moe ST. Criterion-related validity of the Borg ratings of perceived  
2 exertion scale in healthy individuals: A meta-analysis. *J Sports Sci* Published Online First:  
3 2002. doi:10.1080/026404102320761787
- 4 51 Forster H V., Dempsey JA, Thomson J, *et al.* Estimation of arterial PO<sub>2</sub>, PCO<sub>2</sub>, pH, and  
5 lactate from arterialized venous blood. *J Appl Physiol* Published Online First: 1972.  
6 doi:10.1152/jappl.1972.32.1.134
- 7 52 Aguiar Jr. AS, Tuon T, Albuquerque MMM, *et al.* The exercise redox paradigm in the  
8 Down's syndrome: Improvements in motor function and increases in blood oxidative  
9 status in young adults. *J Neural Transm* 2008;**115**. doi:10.1007/s00702-008-0120-x
- 10 53 Blanchard J, Mohammadi JD, Conrad KA. Improved liquid-chromatographic  
11 determination of caffeine in plasma. *Clin Chem* Published Online First: 1980.  
12 doi:10.1093/clinchem/26.9.1351
- 13 54 Bakeman R. Recommended effect size statistics for repeated measures designs. *Behav*  
14 *Res Methods* Published Online First: 2005. doi:10.3758/BF03192707
- 15 55 Schulz KF, Altman DC, Moher D. CONSORT 2010 Statement: Updated guidelines for  
16 reporting parallel group randomised trials. *Ital J Public Health* Published Online First:  
17 2010. doi:10.4178/epih/e2014029
- 18 56 Kankaanpää M, Laaksonen D, Taimela S, *et al.* Age, sex, and body mass index as  
19 determinants of back and hip extensor fatigue in the isometric Sorensen back  
20 endurance test. *Arch Phys Med Rehabil* Published Online First: 1998.  
21 doi:10.1016/S0003-9993(98)90173-3
- 22 57 Alves AC de B, Bristot VJ de O, Limana MD, *et al.* Role of Adenosine A<sub>2A</sub> Receptors in  
23 the Central Fatigue of Neurodegenerative Diseases. *J Caffeine Adenosine Res*  
24 2019;**9**:145–56. doi:10.1089/caff.2019.0009

- 1 58 Presland JD, Dowson MN, Cairns SP. Changes of motor drive, cortical arousal and  
2 perceived exertion following prolonged cycling to exhaustion. *Eur J Appl Physiol*  
3 Published Online First: 2005. doi:10.1007/s00421-005-1395-3
- 4 59 Guo F, Sun YJ, Zhang RH. Perceived exertion during muscle fatigue as reflected in  
5 movement-related cortical potentials: An event-related potential study. *Neuroreport*  
6 Published Online First: 2017. doi:10.1097/WNR.0000000000000732
- 7 60 Fontes EB, Okano AH, De Guio F, *et al.* Brain activity and perceived exertion during  
8 cycling exercise: An fMRI study. *Br J Sports Med* Published Online First: 2015.  
9 doi:10.1136/bjsports-2012-091924
- 10 61 Solano AF, Scheffer D da L, Alves AC de B, *et al.* Potential pitfalls when investigating the  
11 ergogenic effects of caffeine in mice. *J Syst Integr Neurosci* Published Online First: 2017.  
12 doi:10.15761/jsin.1000156
- 13 62 Meeusen R, Watson P, Hasegawa H, *et al.* Central fatigue: The serotonin hypothesis and  
14 beyond. *Sport. Med.* 2006. doi:10.2165/00007256-200636100-00006
- 15 63 Nunes EJ, Randall PA, Santerre JL, *et al.* Differential effects of selective adenosine  
16 antagonists on the effort-related impairments induced by dopamine D1 and D2  
17 antagonism. *Neuroscience* Published Online First: 2010.  
18 doi:10.1016/j.neuroscience.2010.05.068
- 19 64 Yohn SE, Arif Y, Haley A, *et al.* Effort-related motivational effects of the pro-  
20 inflammatory cytokine interleukin-6: pharmacological and neurochemical  
21 characterization. *Psychopharmacology (Berl)* Published Online First: 2016.  
22 doi:10.1007/s00213-016-4392-9
- 23 65 Addicott MA, Laurienti PJ. A comparison of the effects of caffeine following abstinence  
24 and normal caffeine use. *Psychopharmacology (Berl)* Published Online First: 2009.



- 1           doi:10.1007/s00213-009-1668-3
- 2   66   Paluska SA. Caffeine and Exercise. *Curr Sports Med Rep* Published Online First: 2003.  
3           doi:10.1249/00149619-200308000-00008
- 4   67   Fredholm BB, Bättig K, Holmén J, *et al.* Actions of caffeine in the brain with special  
5           reference to factors that contribute to its widespread use. *Pharmacol. Rev.* 1999.
- 6   68   Ciruela F, Casadó V, Rodrigues RJ, *et al.* Presynaptic control of striatal glutamatergic  
7           neurotransmission by adenosine A1-A2A receptor heteromers. *J Neurosci* Published  
8           Online First: 2006. doi:10.1523/JNEUROSCI.3574-05.2006
- 9   69   Fuxe K, Marcellino D, Borroto-Escuela DO, *et al.* Adenosine-dopamine interactions in  
10          the pathophysiology and treatment of cns disorders. *CNS Neurosci. Ther.* 2010.  
11          doi:10.1111/j.1755-5949.2009.00126.x
- 12   70   Sawynok J, Reid A. Caffeine antinociception: Role of formalin concentration and  
13          adenosine A1 and A2 receptors. *Eur J Pharmacol* Published Online First: 1996.  
14          doi:10.1016/0014-2999(95)00791-1
- 15   71   Porkka-Heiskanen T, Strecker RE, Thakkar M, *et al.* Adenosine: A mediator of the sleep-  
16          inducing effects of prolonged wakefulness. *Science (80- )* Published Online First: 1997.  
17          doi:10.1126/science.276.5316.1265
- 18   72   Snyder SH. Adenosine as a Neuromodulator. *Annu Rev Neurosci* Published Online First:  
19          1985. doi:10.1146/annurev.ne.08.030185.000535
- 20   73   Inghilleri M, Berardelli A, Marchetti P, *et al.* Effects of diazepam, baclofen and  
21          thiopental on the silent period evoked by transcranial magnetic stimulation in humans.  
22          *Exp Brain Res* Published Online First: 1996. doi:10.1007/BF00229631
- 23   74   Priori A, Berardelli A, Inghilleri M, *et al.* Motor cortical inhibition and the dopaminergic

- 1 system: Pharmacological changes in the silent period after transcranial brain  
2 stimulation in normal subjects, patients with parkinson's disease and drug-induced  
3 parkinsonism. *Brain* Published Online First: 1994. doi:10.1093/brain/117.2.317
- 4 75 Cerqueira V, de Mendonça A, Minez A, *et al.* Does caffeine modify corticomotor  
5 excitability? *Neurophysiol Clin* Published Online First: 2006.  
6 doi:10.1016/j.neucli.2006.08.005
- 7 76 Ferré S, Díaz-Ríos M, Salamone JD, *et al.* New Developments on the Adenosine  
8 Mechanisms of the Central Effects of Caffeine and Their Implications for  
9 Neuropsychiatric Disorders. *J Caffeine Adenosine Res* Published Online First: 2018.  
10 doi:10.1089/caff.2018.0017
- 11 77 Popoli P, Reggio R, Pèzzola A, *et al.* Adenosine A1 and A(2A) receptor antagonists  
12 stimulate motor activity: Evidence for an increased effectiveness in aged rats. *Neurosci*  
13 *Lett* Published Online First: 1998. doi:10.1016/S0304-3940(98)00533-3
- 14 78 Nehlig A, Daval JL, Debry G. Caffeine and the central nervous system: mechanisms of  
15 action, biochemical, metabolic and psychostimulant effects. *Brain Res. Rev.* 1992.  
16 doi:10.1016/0165-0173(92)90012-B

17

## 18 **FIGURE'S LEGENDS**

19 **Fig.1** – CONSORT flow diagram. CONSORT, Consolidated Standards of Reporting Trials.

20 **Fig.2** – Effects of caffeine on rated perceived effort (A), heart rate (B-C) and EMG/force ratio  
21 during the Biering-Sørensen test.

- 1 **Fig.3** – Effects of caffeine on the median frequency (A-C) and recruitment (D-E) of the
- 2 *multifidus spinae* muscle during the first 90 seconds and 10% final of the Biering-Sørensen test.
- 3 \*  $P < 0.05$  vs. saline (Wilcoxon matched-pairs signed-rank test).
  
- 4 **Fig.4** – Effects of caffeine on the median frequency (A-C) and recruitment (D-E) of the
- 5 *transversalis/interne oblique* muscles during the first 90 seconds and 10% final of the Biering-
- 6 Sørensen test.

Individuals showing interest (n=51)

Ineligible (n=23)

- Did not meet inclusion criteria (n=20)
- Declined further participation (n=3)

Invited for eligibility and testing (n=28)

Excluded (n=1)

- Unable to draw blood (n=1)

Total completers (n=27)

Completed per protocol (n=27)

Analyzed intention-to-treat (n=26-27)

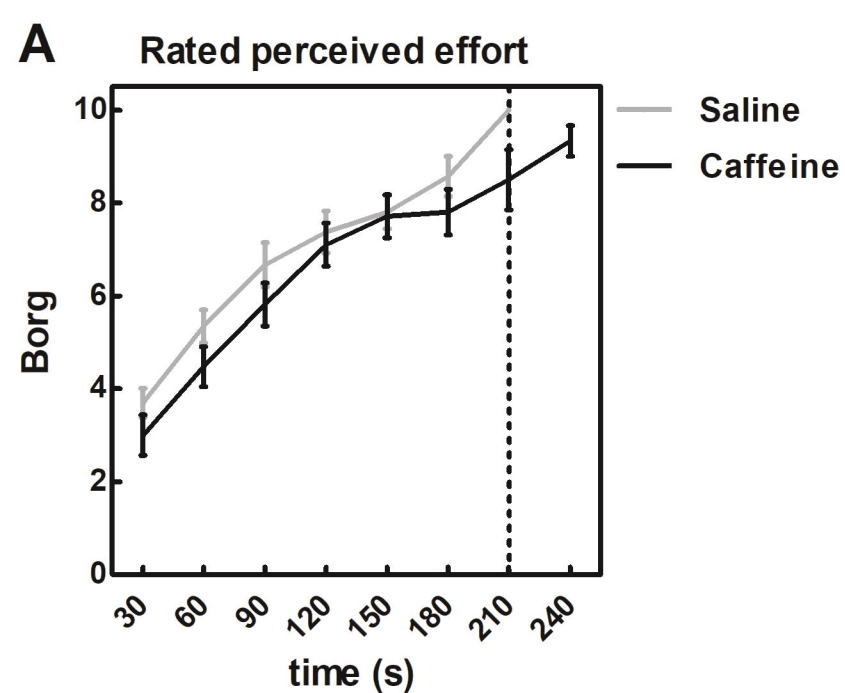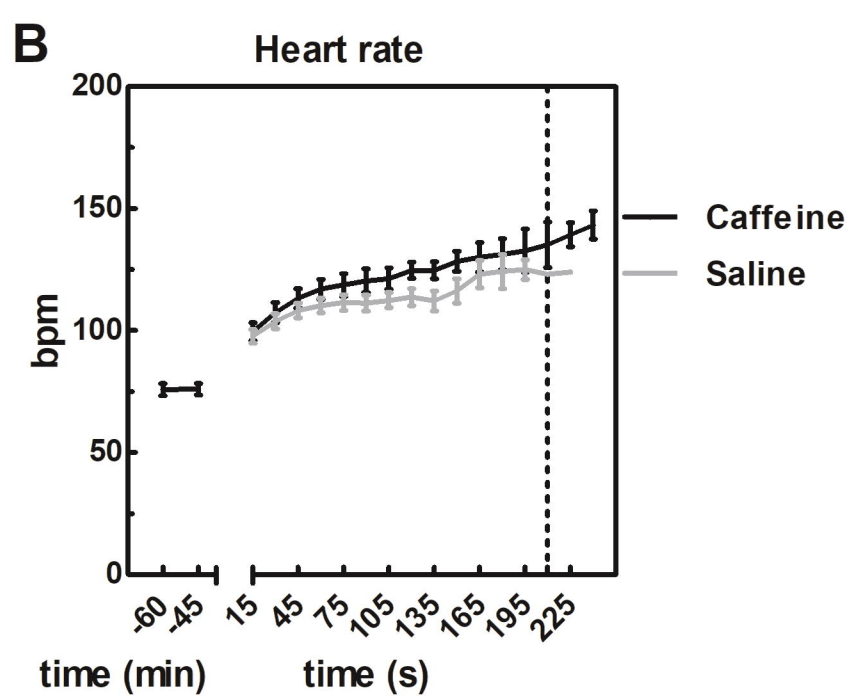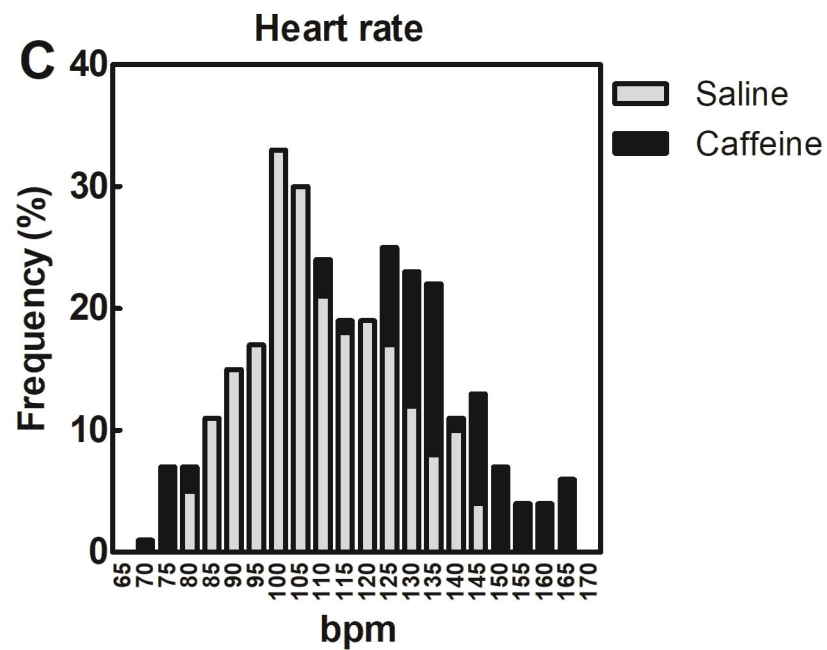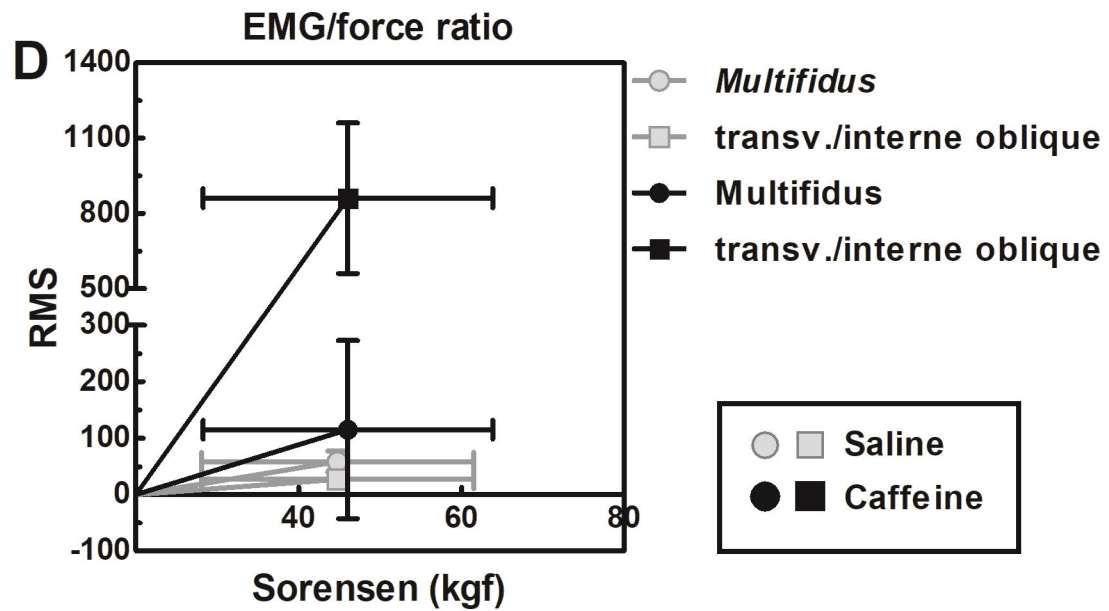

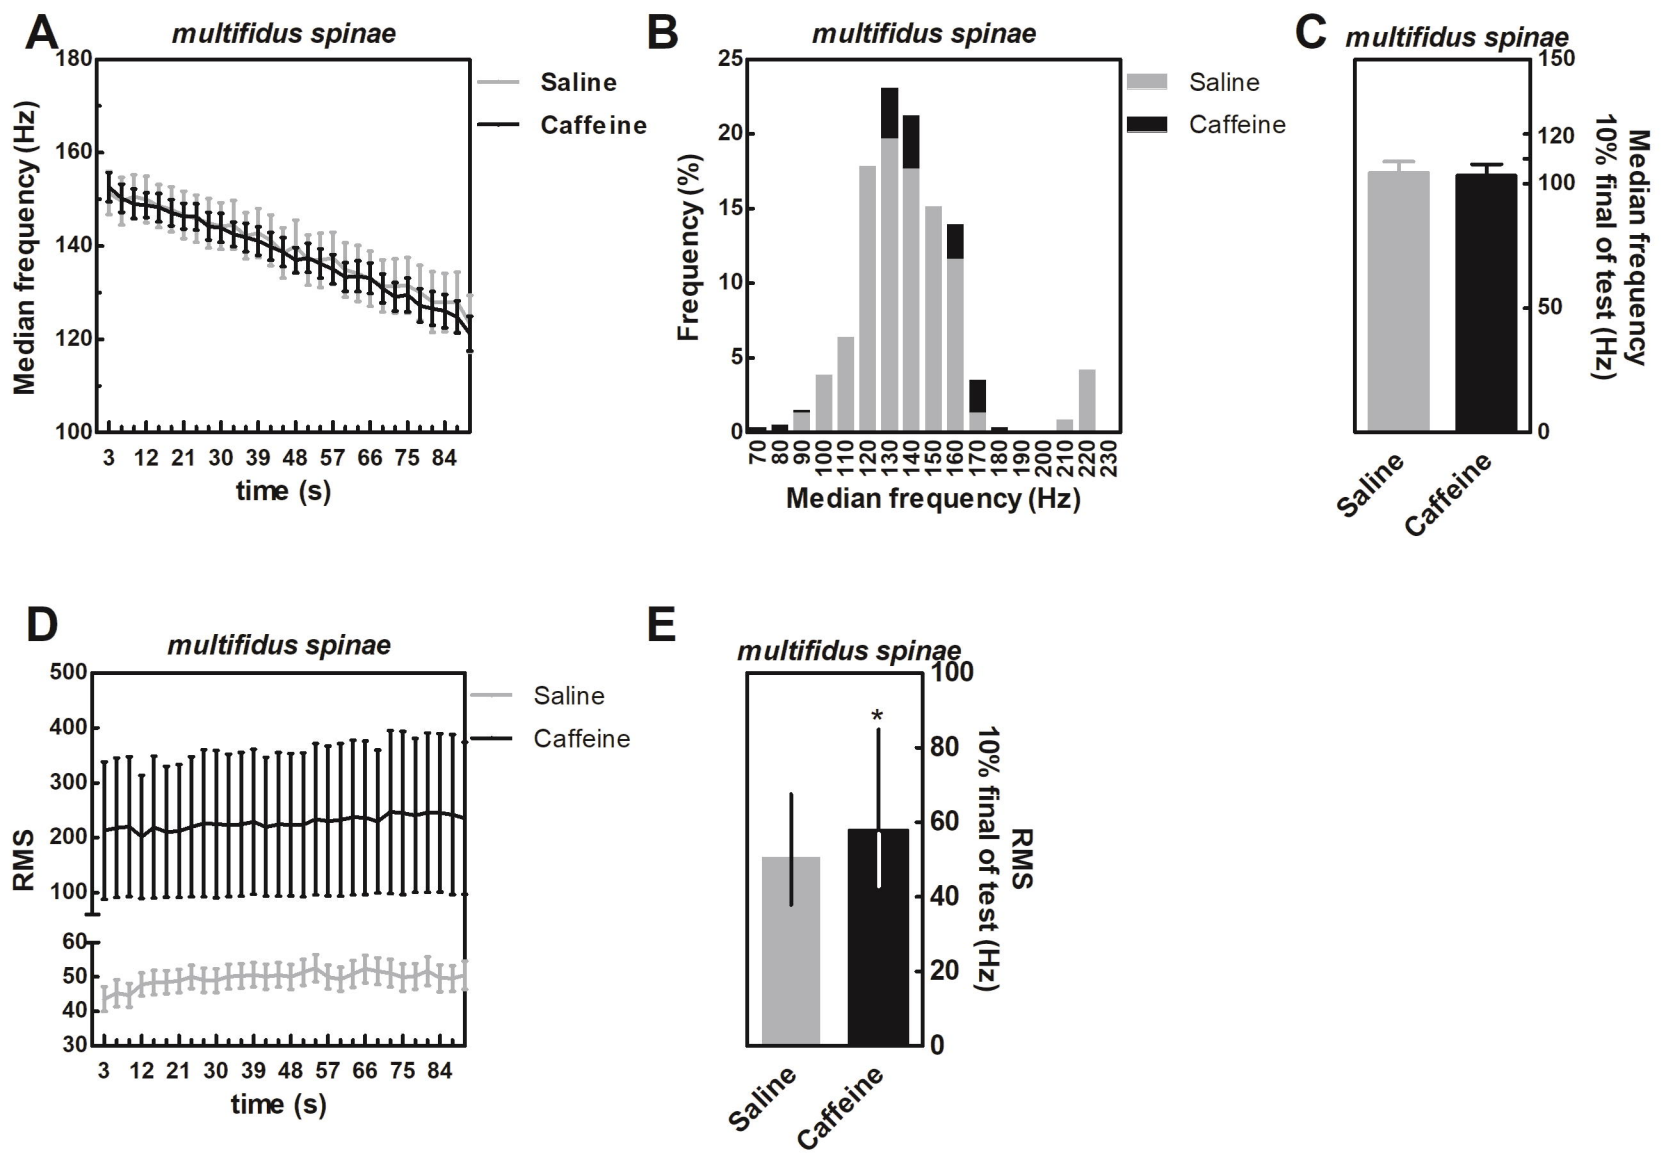

**A** *transversalis/interne oblique*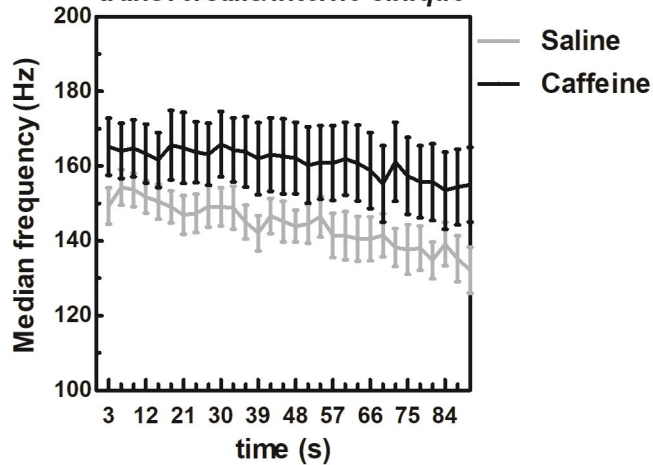**B** *transversalis/interne oblique*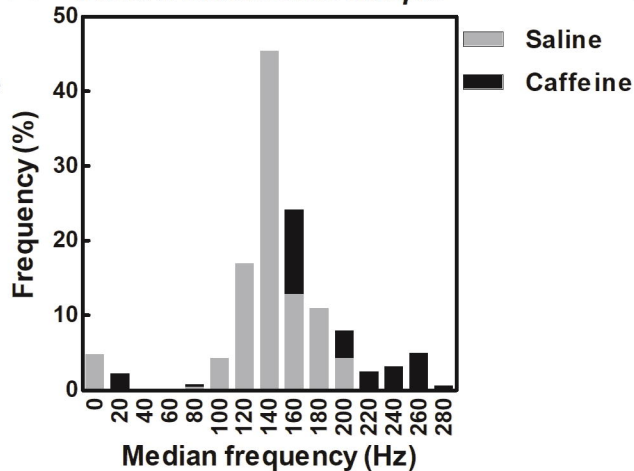**C** *transversalis/interne oblique*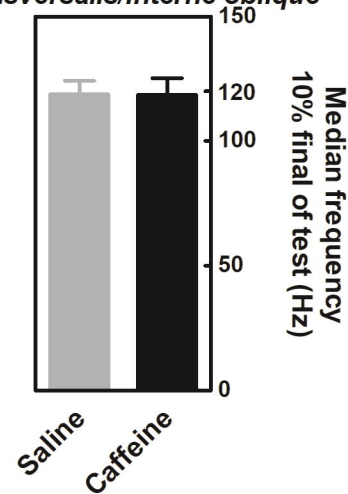**D** *transversalis/interne oblique*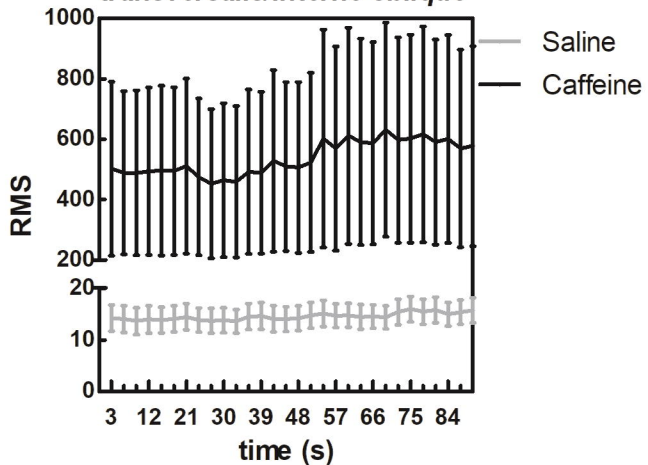**E** *transversalis/interne oblique*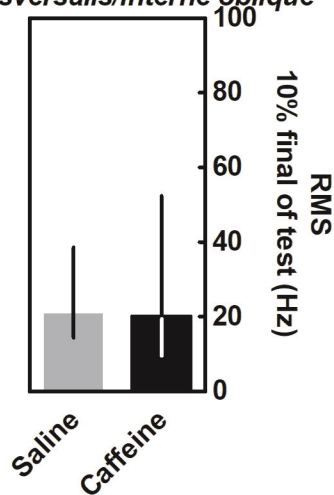

Source: https://www.medrxiv.org/content/10.1101/2020.06.08.20122531.full.pdf
